# Supplementary material
Source: ML conference proceedings conference paper supplement (https://openreview.net/forum?id=MQ2sAGunyBP)

# SUPPLEMENTARY MATERIALS FOR “R4D: UTILIZING REFERENCE OBJECTS FOR LONG-RANGE DISTANCE ESTIMATION”

**Yingwei Li\***   **Tiffany Chen†**   **Maya Kabkab†**   **Ruichi Yu**  
**Longlong Jing**   **Yurong You\***   **Hang Zhao\***  
Waymo LLC  
{ywli, yuhanc, kabkabm}@waymo.com

## MORE QUALITATIVE EXAMPLES ON WAYMO OPEN DATASET - LONG-RANGE LABELS DATASET

We also provide more qualitative examples of the output of the attention module in this file. All images are from our proposed Waymo Open Dataset - Long-Range Labels dataset. Similar to Figure 8 in the main manuscript, the target objects are highlighted in yellow. References with the largest attention weights are highlighted in red. Other references are colored in blue. As before, we observe that the most important references are often close to or in the same lane as the target, and share a similar pose.

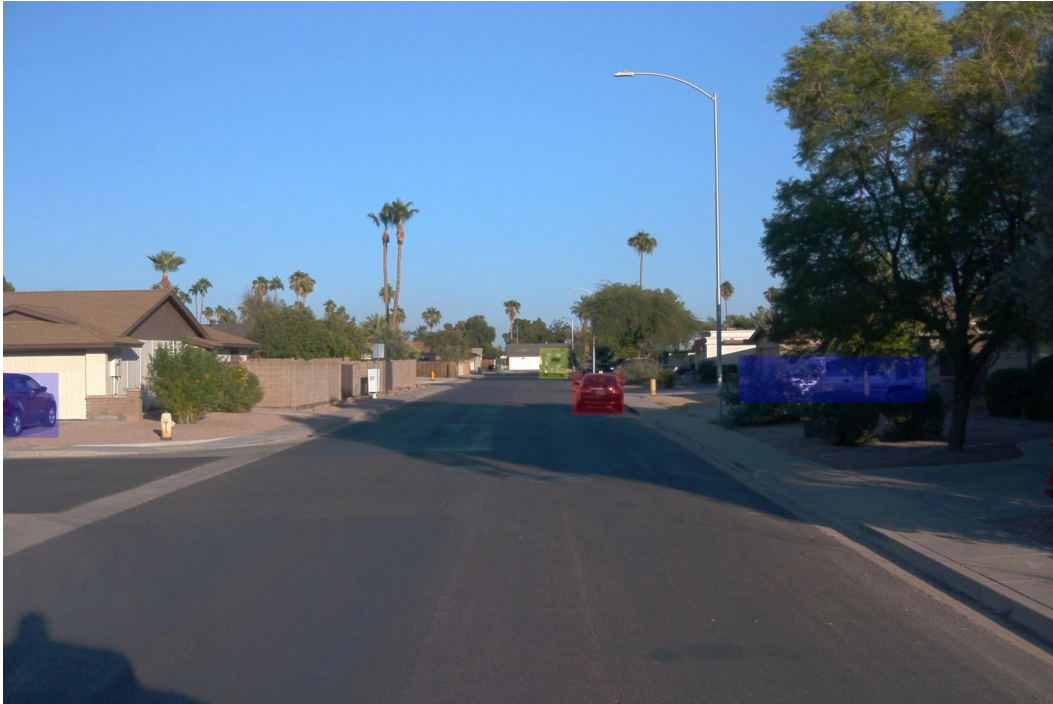

\*Work done while at Waymo LLC. †Equal contribution.

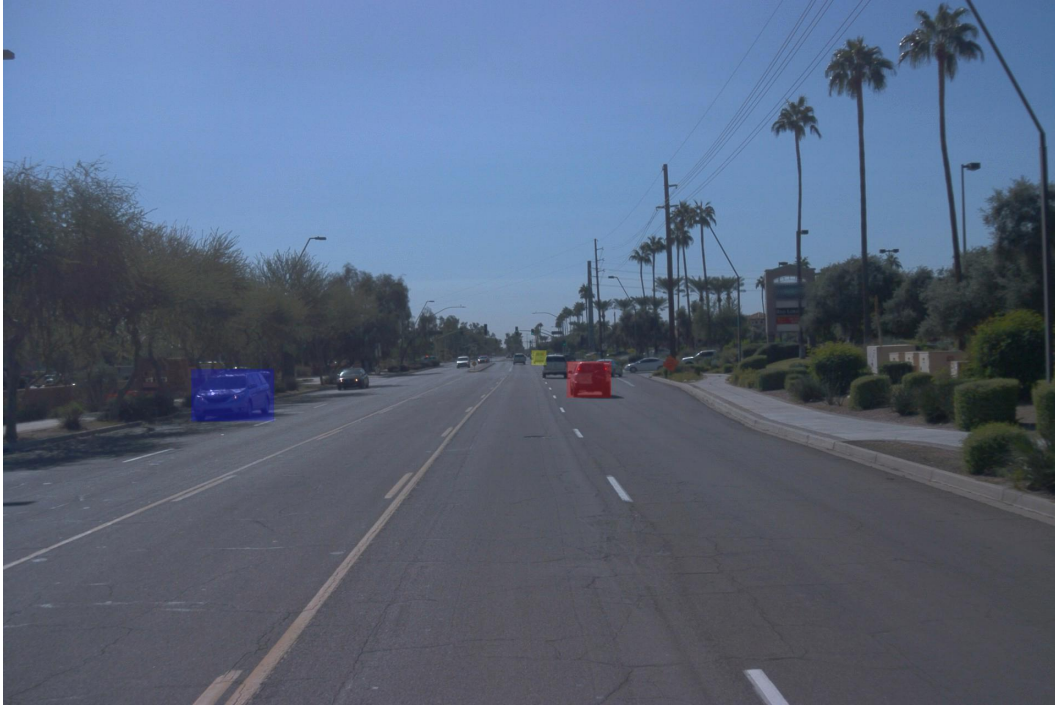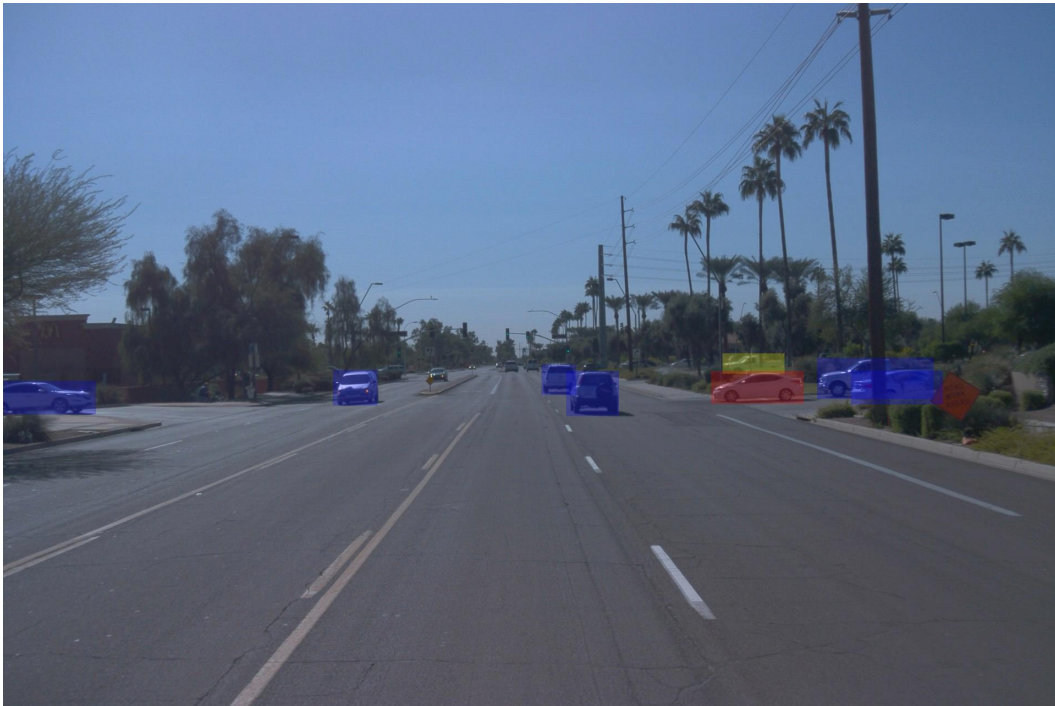



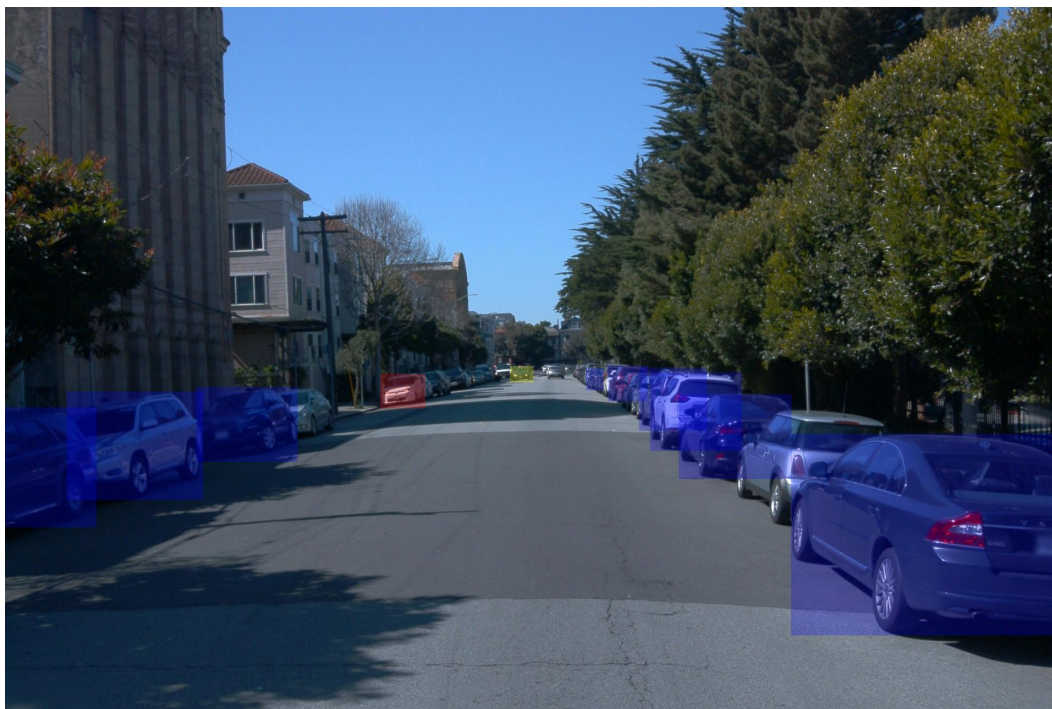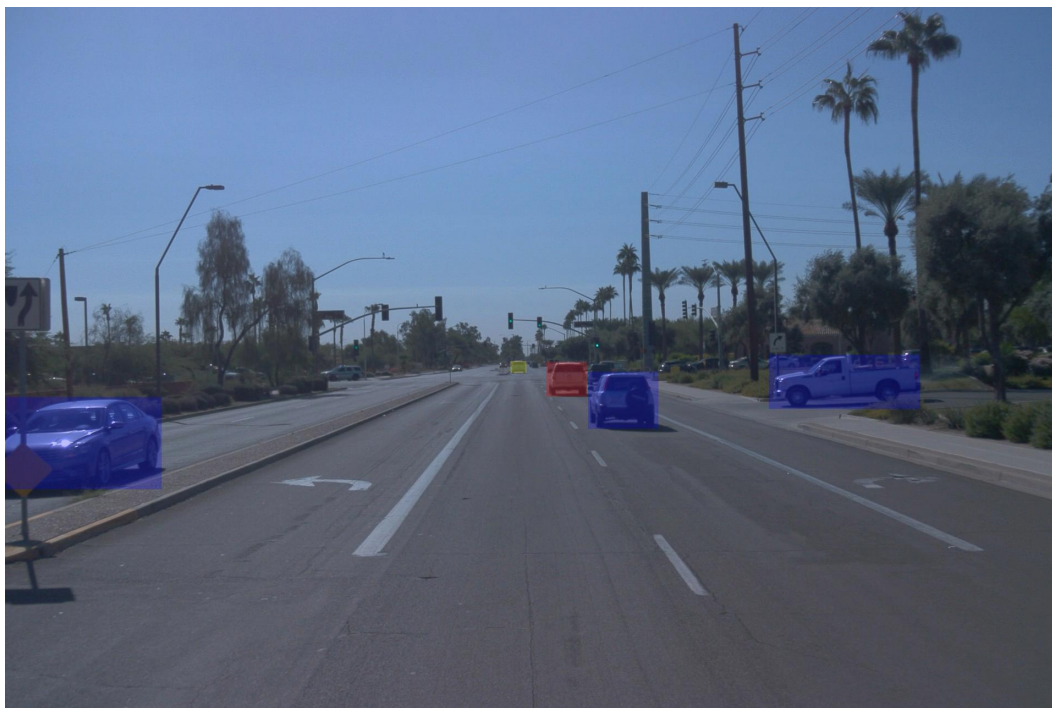

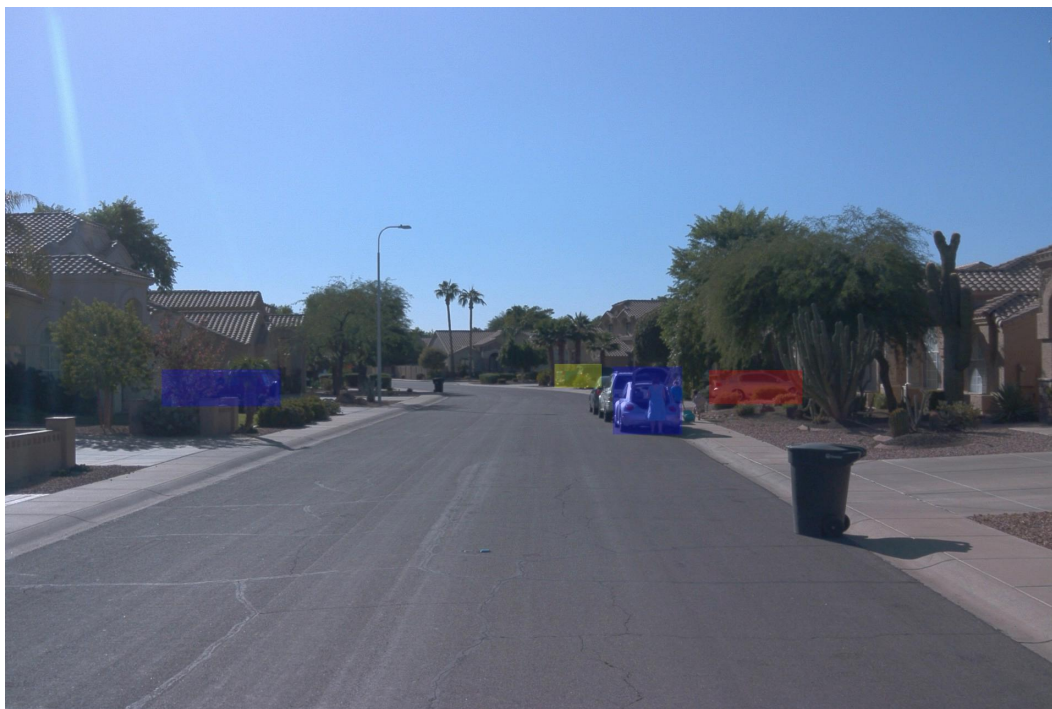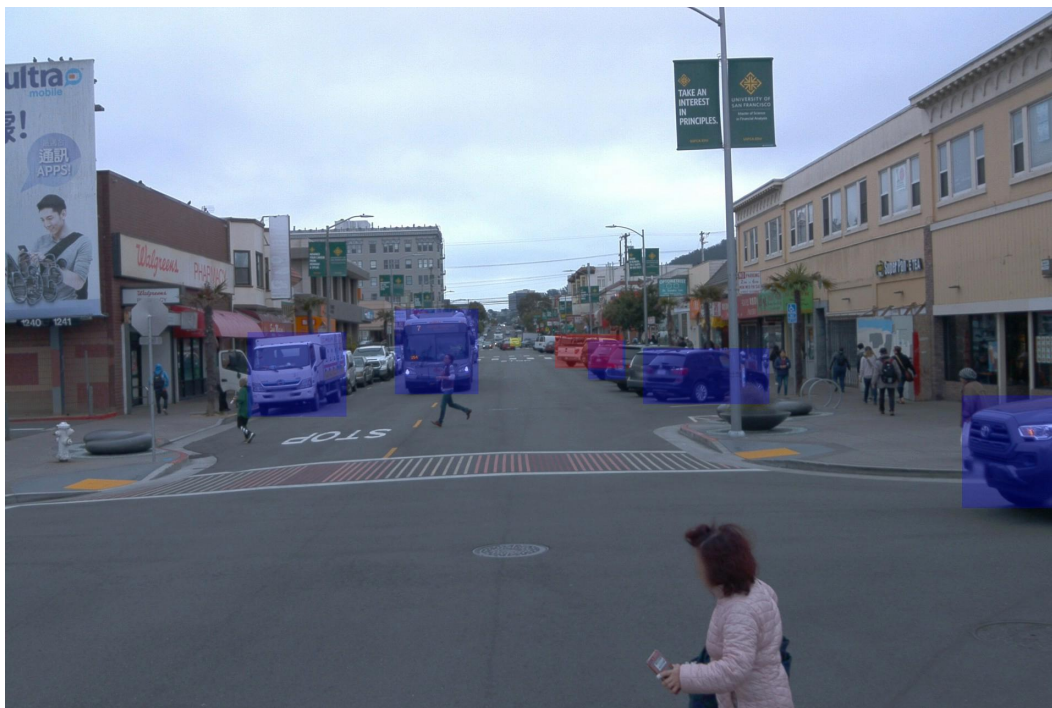



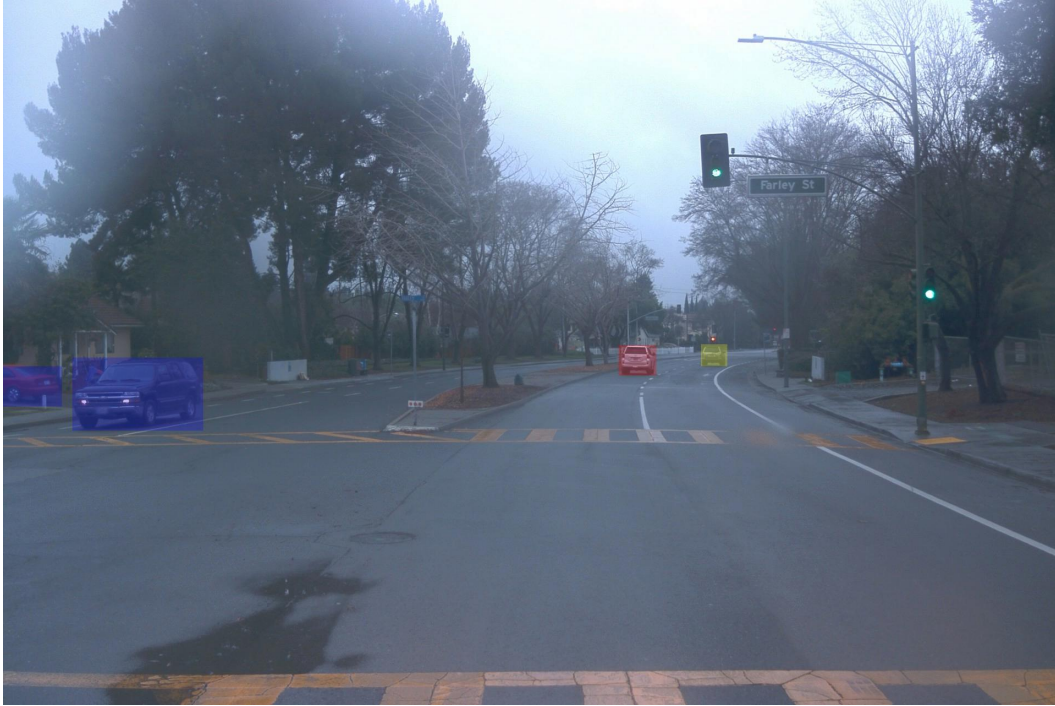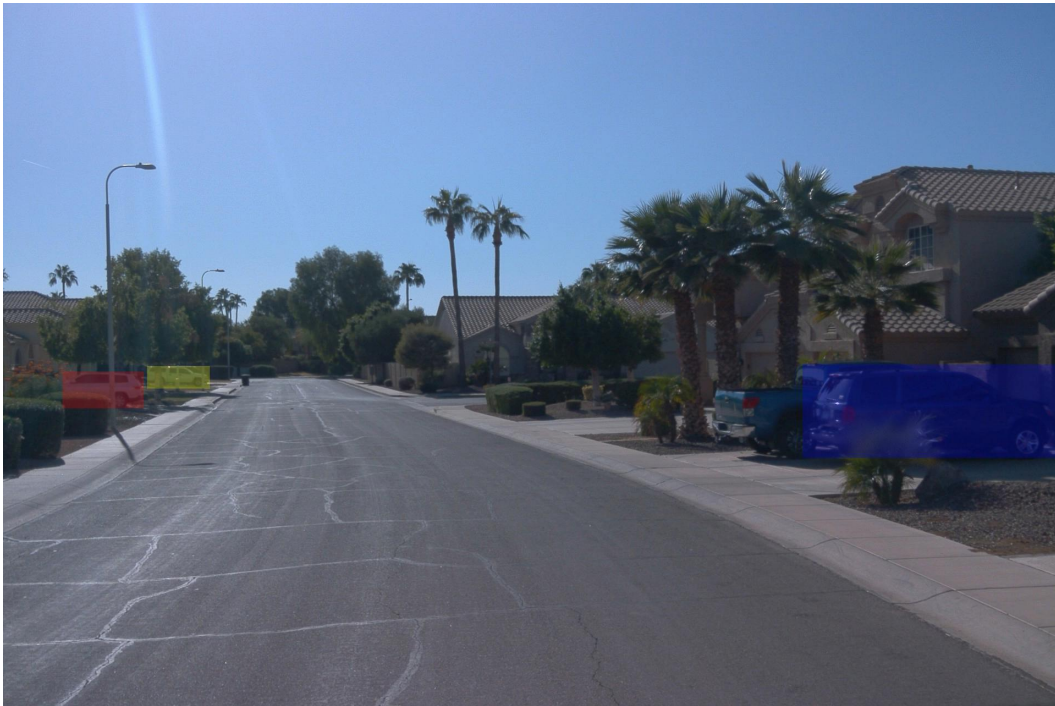

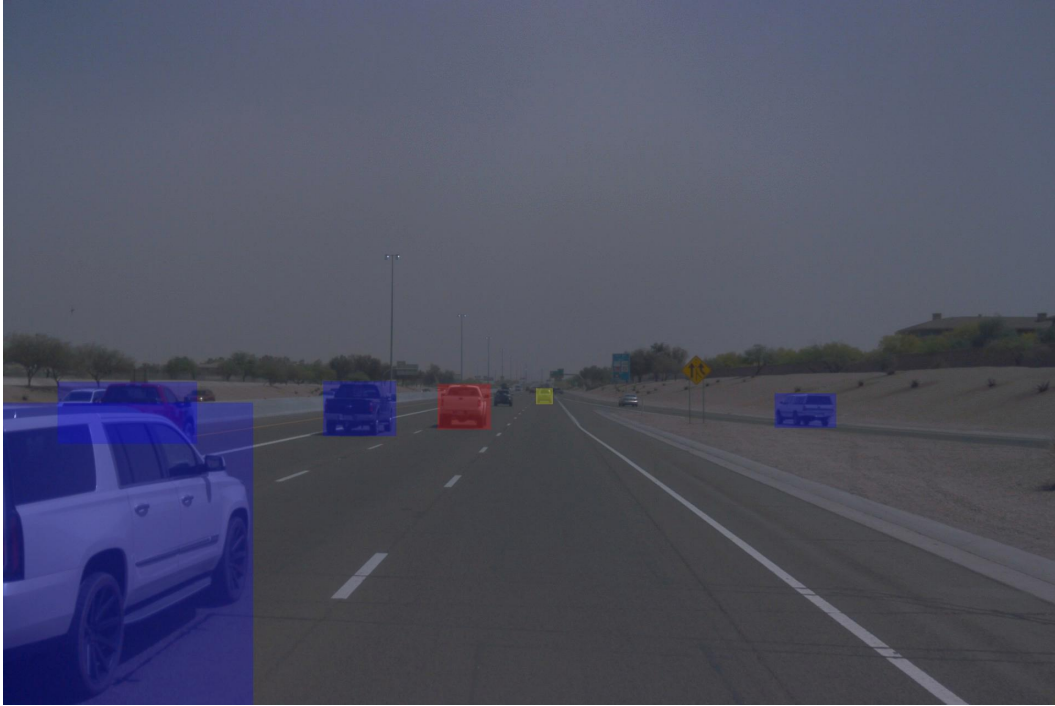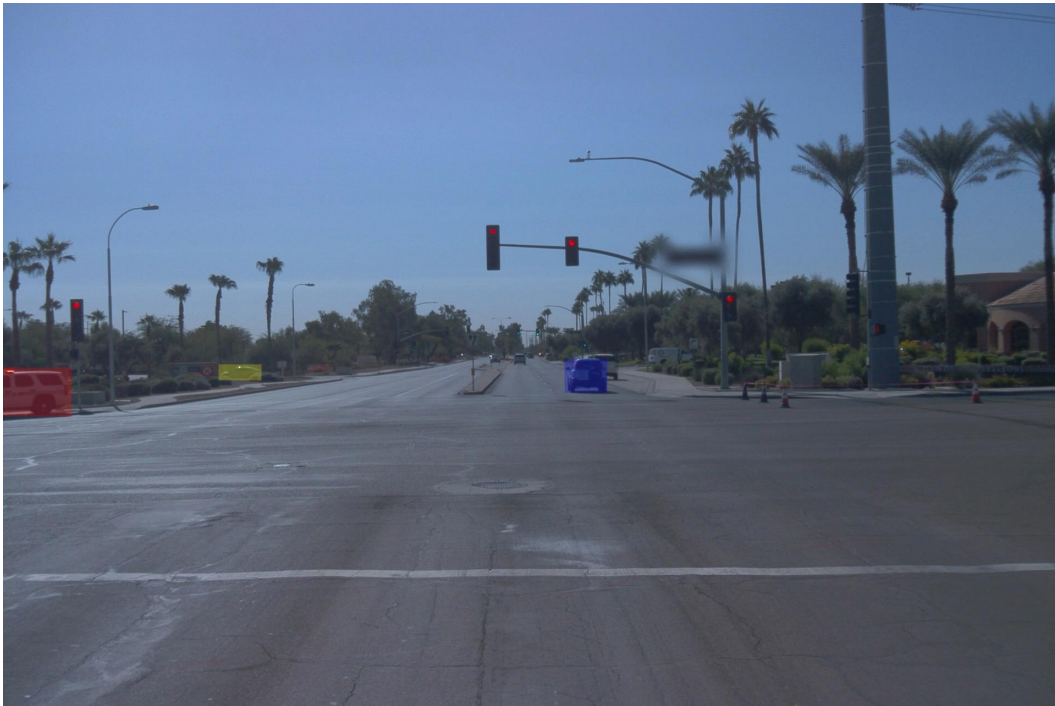



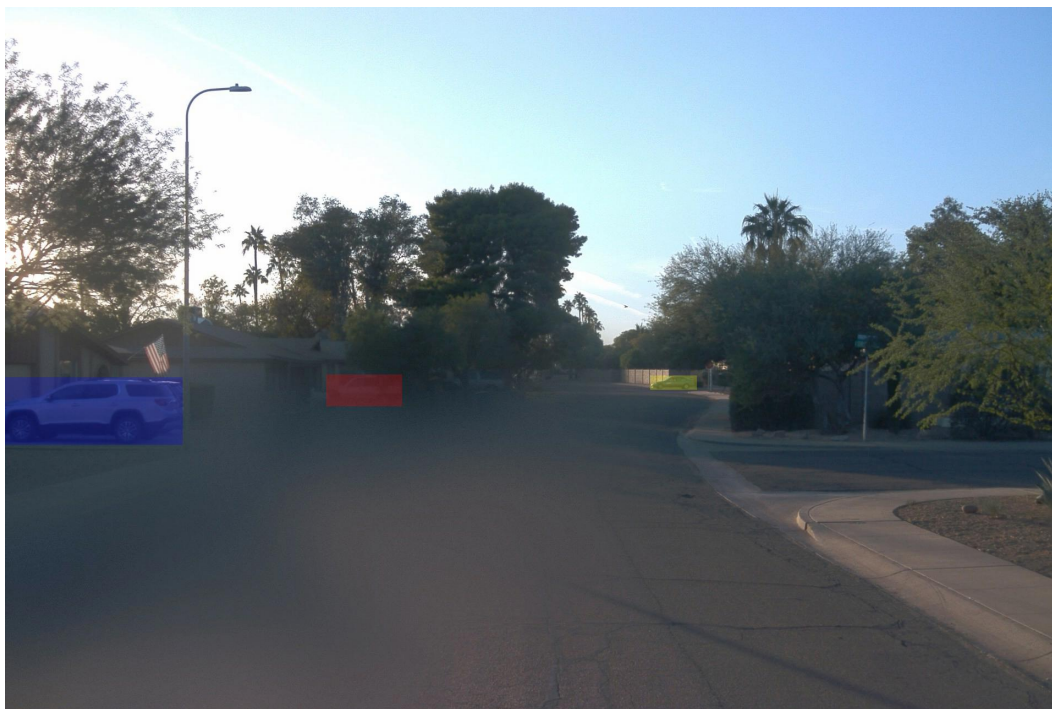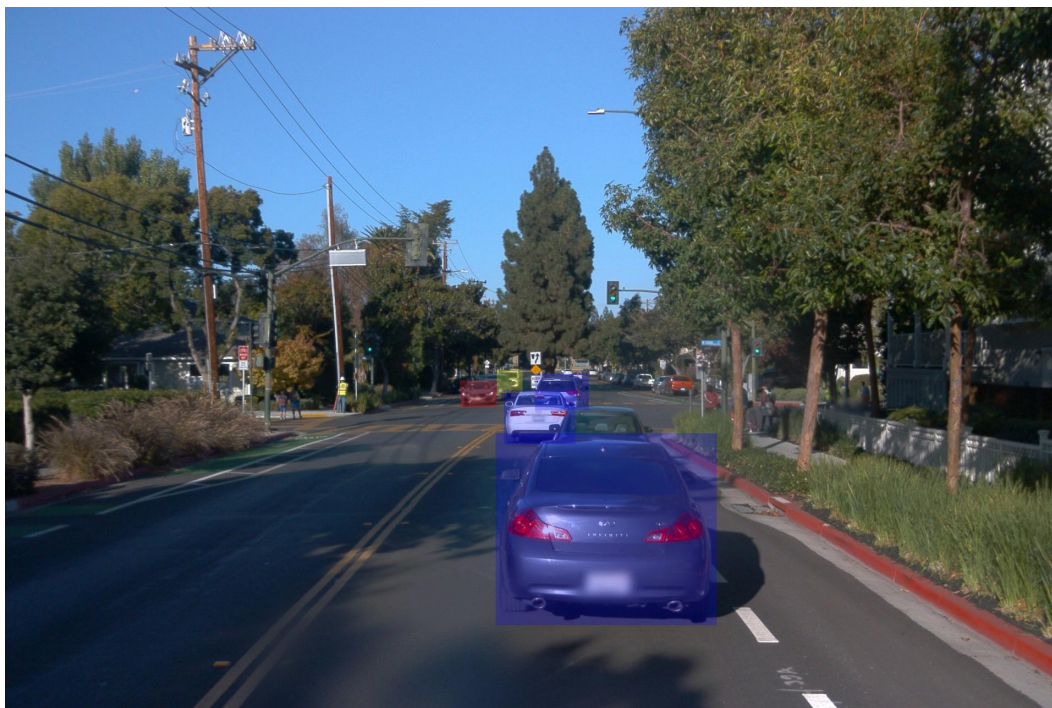

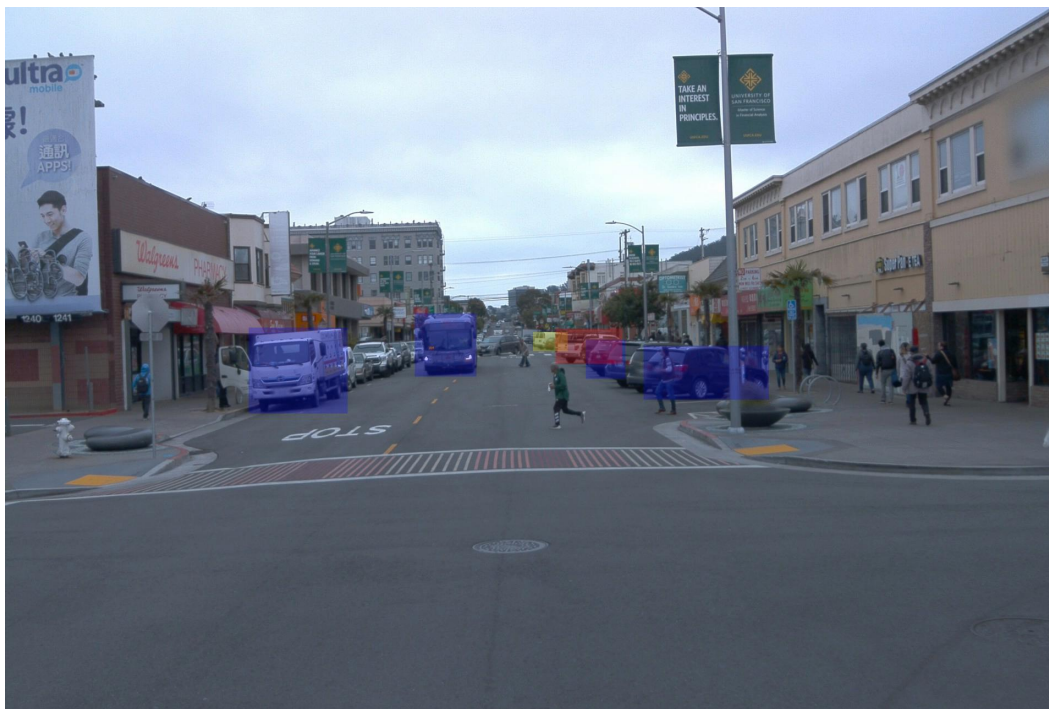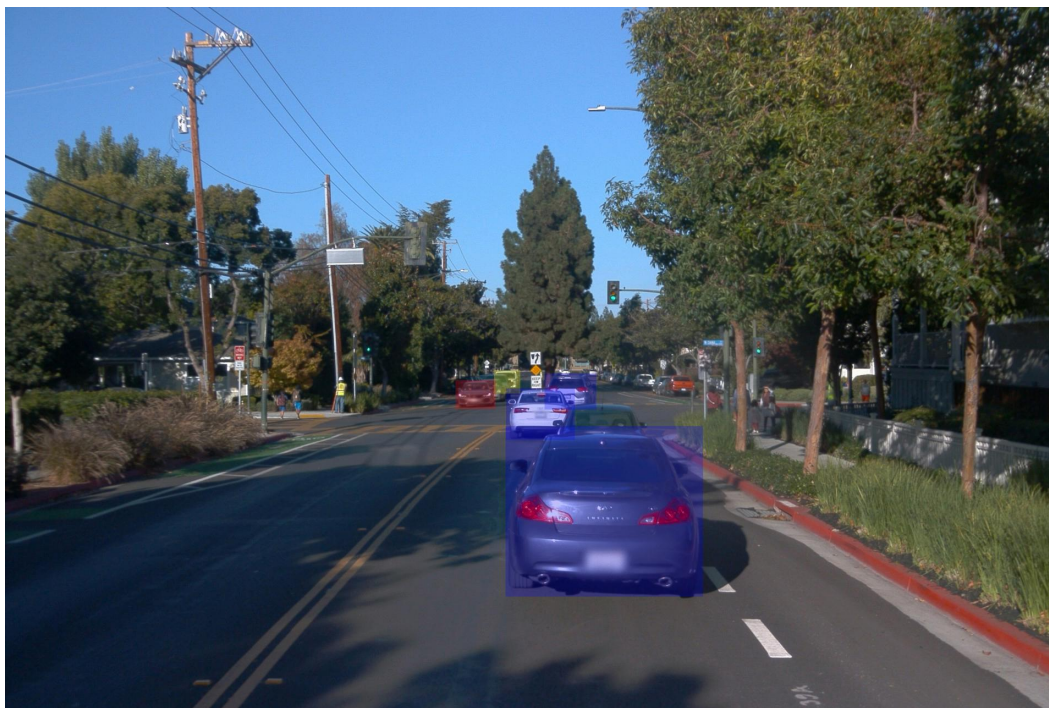



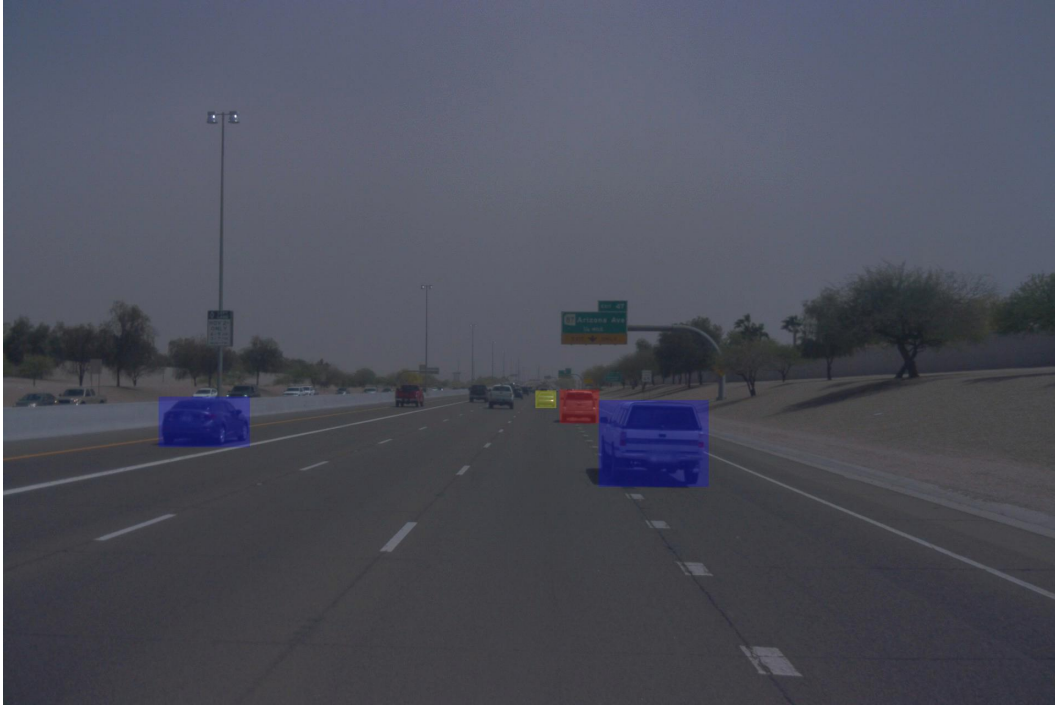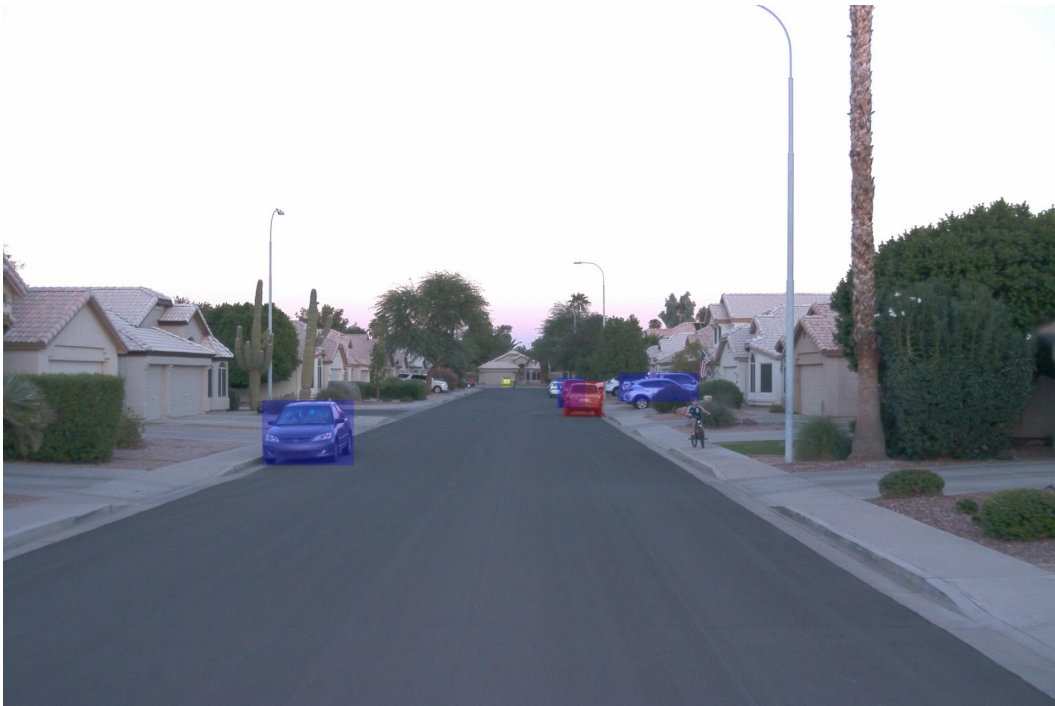

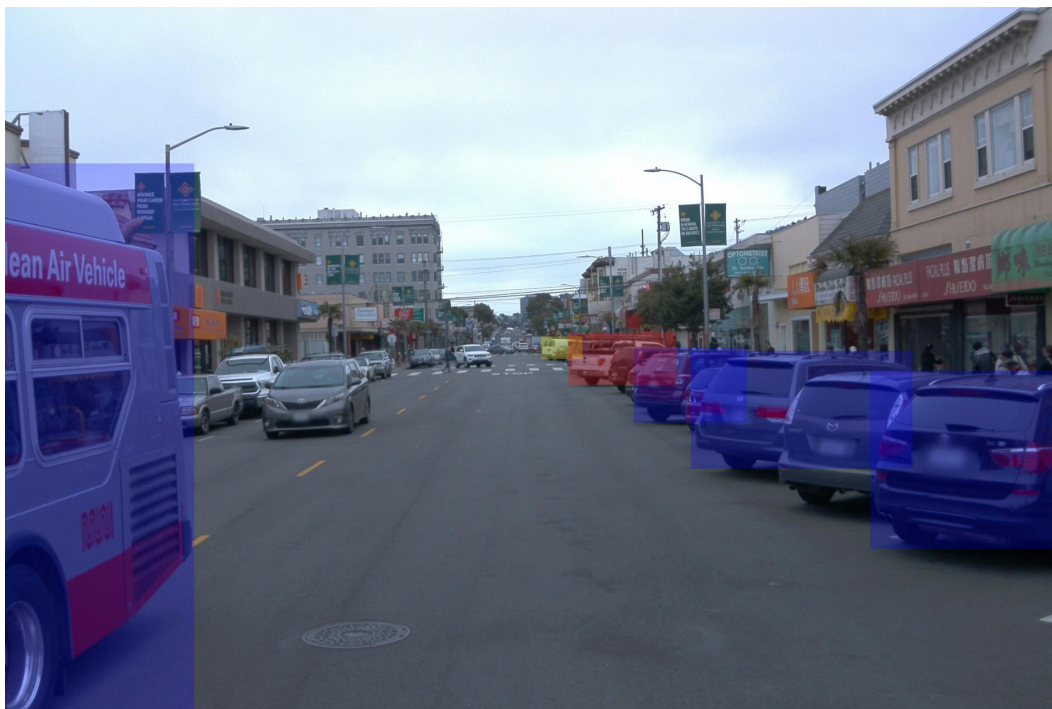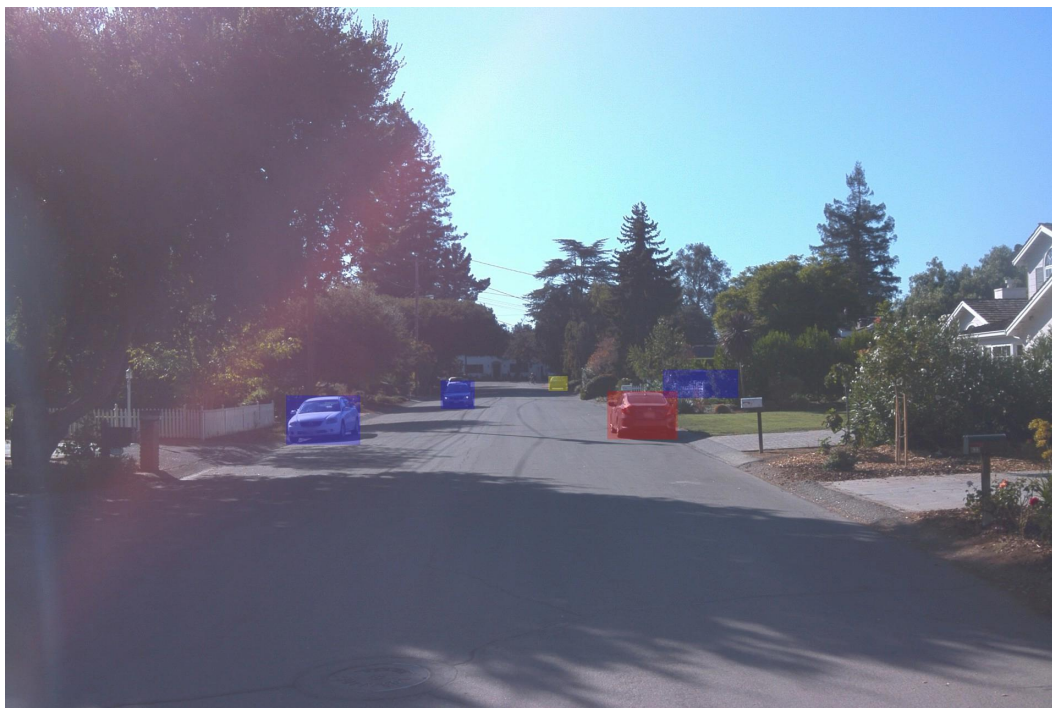



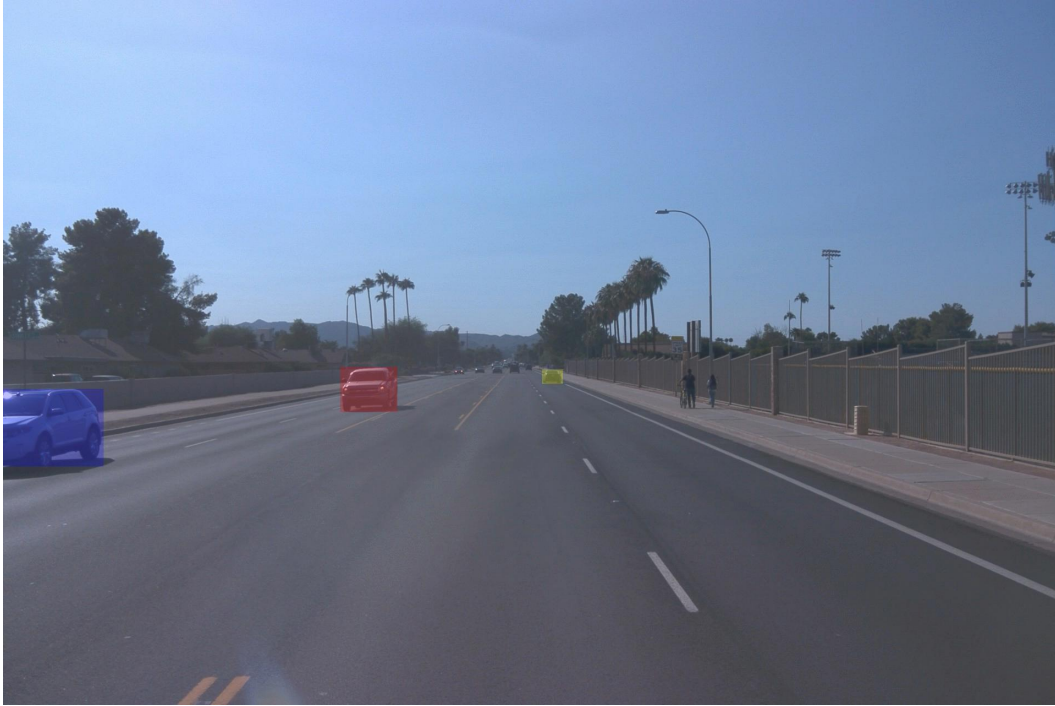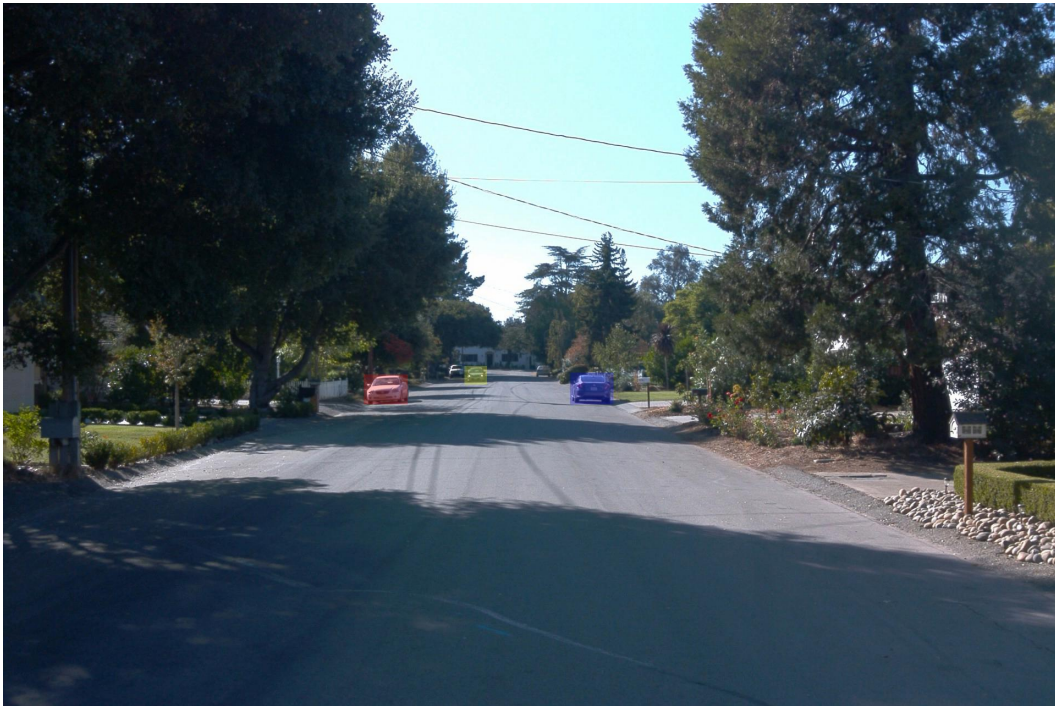

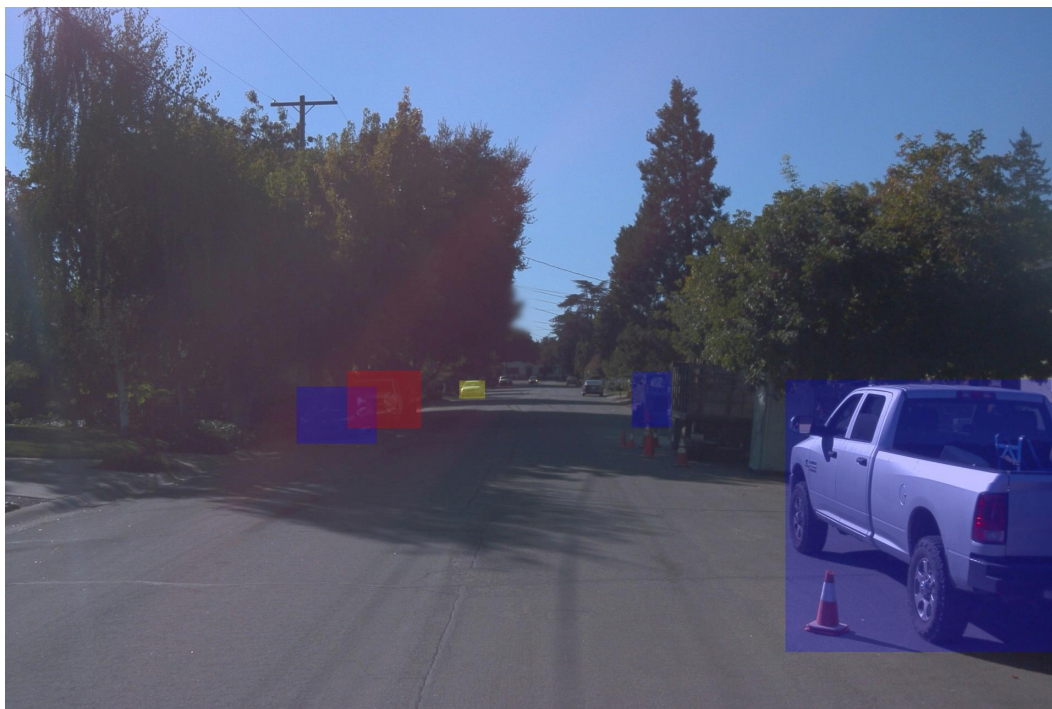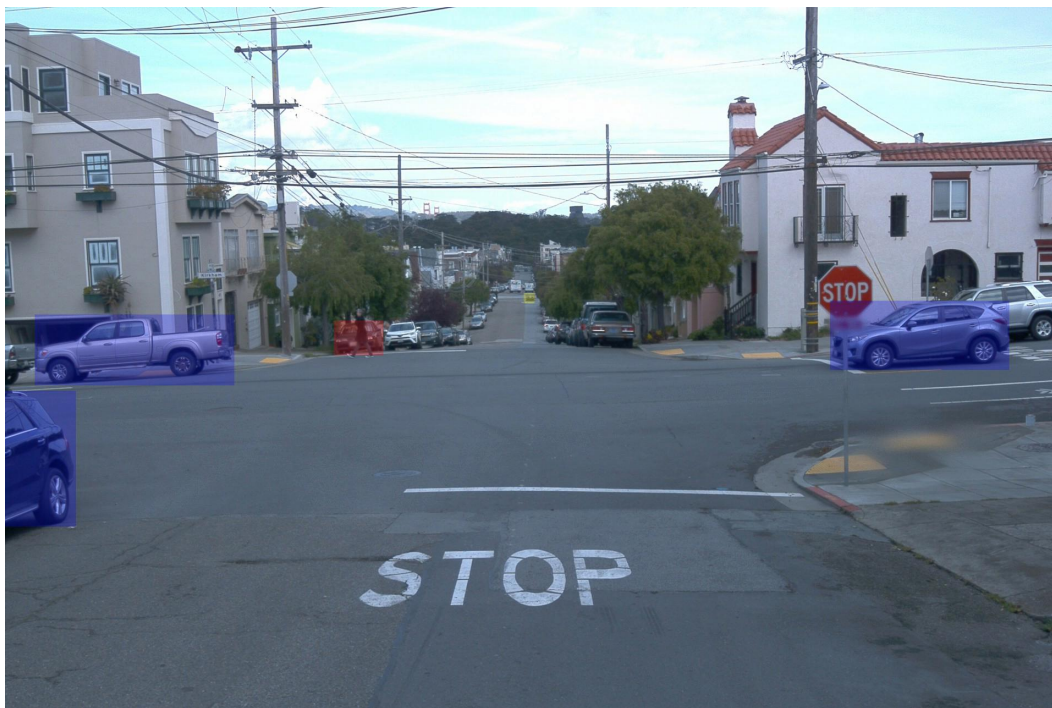



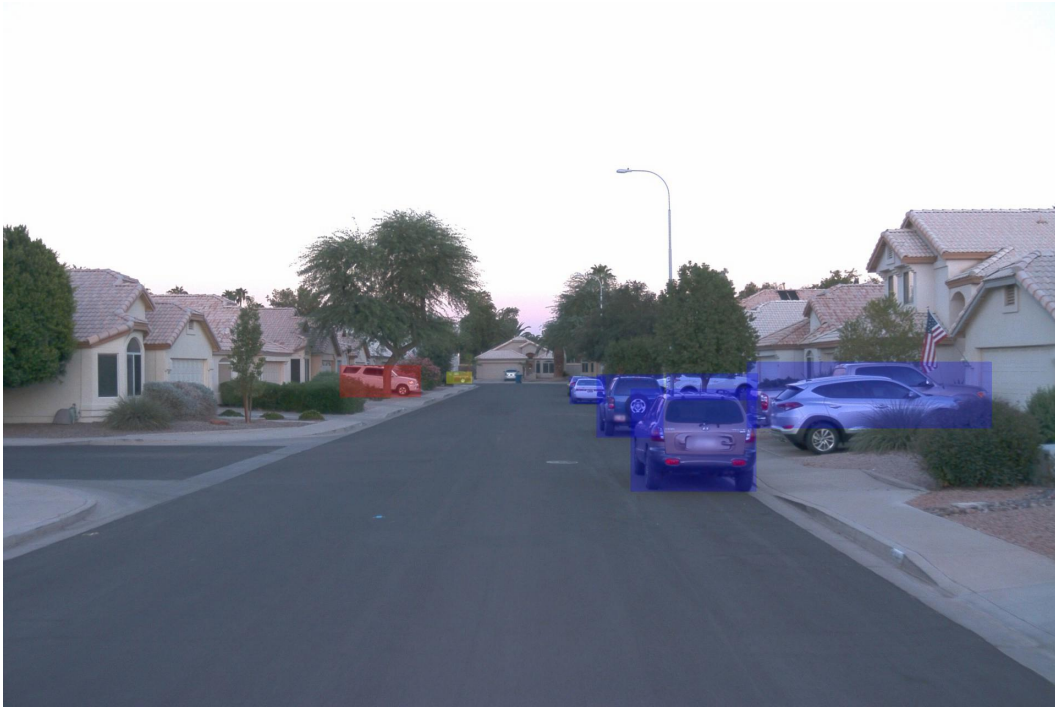

Supplement: supplementary_material [file attachment]
